# Supplementary material for: A Bibliometric Analysis of Lake Restoration with Submerged Macrophytes
Source: MDPI journal article supplement (doi:10.3390/w15132411), 2023-06-29
Supplement: s1 [file s1]

**Table S1** Cluster information of keyword co-occurrence analysis. The number of parentheses represents the log-likelihood ratio of terms from keywords. The top terms are significant at 0.05 level.

| Cluster ID | Size | Silhouette | Average Year | Top terms (log-likelihood ratio)                                                                                                                                     |
|------------|------|------------|--------------|----------------------------------------------------------------------------------------------------------------------------------------------------------------------|
| 0          | 48   | 0.647      | 2009         | great lakes (20.24, 1.0E-4); coastal wetlands (16.04, 1.0E-4); coastal wetland (14.41, 0.001); habitat (11.96, 0.001); populations (9.6, 0.005)                      |
| 1          | 46   | 0.702      | 2001         | alternative stable states (29.9, 1.0E-4); shallow lakes (27.51, 1.0E-4); biomanipulation (26.53, 1.0E-4); phytoplankton (17.75, 1.0E-4); zooplankton (17.7, 1.0E-4)  |
| 2          | 45   | 0.642      | 2010         | photosynthesis (9.72, 0.005); v (9.34, 0.005); sediment microenvironment (9.34, 0.005); sediment phosphorus (9.34, 0.005); microcystis aeruginosa (9.34, 0.005)      |
| 3          | 43   | 0.692      | 2009         | myriophyllum spicatum (29.39, 1.0E-4); clonal diversity (9.43, 0.005); hydraulic force (9.43, 0.005); invasive species (8.43, 0.005); biomanipulation (8.34, 0.005)  |
| 4          | 43   | 0.766      | 2012         | vallisneria natans (18.62, 1.0E-4); competition (16.76, 1.0E-4); disturbance (12.05, 0.001); facilitation (8.88, 0.005); morphological characteristics (8.76, 0.005) |
| 5          | 36   | 0.731      | 2015         | n-alkanes (18.9, 1.0E-4); stable isotope (16.18, 1.0E-4); limiting factors (10.78, 0.005); lake level (10.78, 0.005); p-aq (10.78, 0.005)                            |
| 6          | 30   | 0.789      | 2009         | water clarity (13.87, 0.001); biological control (12.27, 0.001); non-native (12.27, 0.001); common carp (11.88, 0.001); hydrology (11.88, 0.001)                     |
| 7          | 27   | 0.788      | 2009         | seed bank (22.06, 1.0E-4); softwater lakes (13.47, 0.001); dispersal (9.72, 0.005); germination (8.06, 0.005); conservation biology (6.73, 0.01)                     |
| 8          | 24   | 0.88       | 2005         | plants (9.72, 0.005); bacterial community (6.82, 0.01); organic matter (6.08, 0.05); brackish lakes (6.08, 0.05); holocene (6.08, 0.05)                              |

|    |    |       |      |                                                                                                                                                                                                   |
|----|----|-------|------|---------------------------------------------------------------------------------------------------------------------------------------------------------------------------------------------------|
| 9  | 22 | 0.852 | 2007 | remote sensing (16.2, 1.0E-4); submerged aquatic vegetation (sav) (13.31, 0.001); submerged aquatic vegetation (13.14, 0.001); long-term trends (11.79, 0.001); removal efficiency (11.79, 0.001) |
| 10 | 20 | 0.811 | 2015 | ecological status (15.87, 1.0E-4); soluble carbohydrate (13.31, 0.001); water depth (12.47, 0.001); aquatic macrophyte (9.76, 0.005); characeae (9.56, 0.005)                                     |
| 11 | 20 | 0.772 | 2005 | ecological restoration (17.57, 1.0E-4); lake restoration (14.35, 0.001); restoration (7.43, 0.01); aquaculture (6.03, 0.05); tropical limnology (5.66, 0.05)                                      |
| 12 | 11 | 0.841 | 2012 | biomass (8.07, 0.005); anaerobic processes (7.17, 0.01); transparency thresholds (7.17, 0.01); nutrient removal rate (7.17, 0.01); biodegradation (7.17, 0.01)                                    |

---

**Table S2** Cluster information of reference co-citation analysis. The number of parentheses represents the log-likelihood ratio of terms from keywords. The top terms are significant at 0.05 level.

| Cluster ID | Size | Silhouette | Average Year | Top terms (log-likelihood ratio)                                                                                                                                  |
|------------|------|------------|--------------|-------------------------------------------------------------------------------------------------------------------------------------------------------------------|
| 0          | 94   | 0.785      | 2000         | biomanipulation (13.15, 0.001); submerged macrophyte (12.48, 0.001); lake restoration (9.38, 0.005); nitrogen (8.89, 0.005); phosphorus (8.47, 0.005)             |
| 1          | 81   | 0.869      | 2010         | omnivore (19.1, 1.0E-4); phoslock (r) (17.8, 1.0E-4); soluble carbohydrate (16.78, 1.0E-4); macrophytes (12.27, 0.001); vallisneria natans (12.21, 0.001)         |
| 2          | 76   | 0.823      | 2007         | biomanipulation (10.31, 0.005); zooplankton (8.55, 0.005); general ocean turbulence model (8.53, 0.005); ecosystem restoration (8.53, 0.005); fish (7.53, 0.01)   |
| 3          | 68   | 0.796      | 1999         | nutrient removal (4.89, 0.05); littoral zone (4.89, 0.05); biomonitoring (4.89, 0.05); chara (4.54, 0.05); volatile compound (4.22, 0.05)                         |
| 4          | 68   | 0.733      | 1996         | zooplankton community (5.68, 0.05); refuge (5.68, 0.05); holocene (4.64, 0.05); assessment (4.64, 0.05); size-dependent feeding (4.64, 0.05)                      |
| 5          | 68   | 0.881      | 2006         | myriophyllum spicatum (10.56, 0.005); phytoplankton (10.38, 0.005); maifanite (9.85, 0.005); life history (9.85, 0.005); eichhornia crassipes (9.85, 0.005)       |
| 6          | 66   | 0.777      | 1992         | zooplankton (12, 0.001); biomanipulation (10.62, 0.005); fish (9.44, 0.005); top-down control (5.87, 0.05); submerged macrophytes (5.57, 0.05)                    |
| 7          | 61   | 0.834      | 2003         | ecological status (10.95, 0.001); historical changes (9.99, 0.005); wfd (9.99, 0.005); species richness (9.05, 0.005); biomanipulation (8.42, 0.005)              |
| 8          | 38   | 0.951      | 1993         | diatoms (32.33, 1.0E-4); radiometric dating (8.77, 0.005); transfer function (8.77, 0.005); sediment accumulation tales (8.77, 0.005); geochemistry (8.77, 0.005) |
| 9          | 38   | 0.792      | 1997         | shallow lakes (6.35, 0.05); paleolimnology (6.06, 0.05); chironomids (5.35, 0.05); cattail (5.3, 0.05); wind (5.3, 0.05)                                          |

|    |    |       |      |                                                                                                                                                        |
|----|----|-------|------|--------------------------------------------------------------------------------------------------------------------------------------------------------|
| 10 | 33 | 0.819 | 1990 | aquatic weeds (6.9, 0.01); waterbirds (6.7, 0.01); hydrilla (6.7, 0.01); light (6.7, 0.01); treatment wetlands (6.7, 0.01)                             |
| 11 | 29 | 0.957 | 2007 | cyprinus carpio (12.35, 0.001); common carp (12.35, 0.001); non-native (12.35, 0.001); bioturbation (10.5, 0.005); water clarity (9.35, 0.005)         |
| 12 | 27 | 0.907 | 1985 | clear water (10.36, 0.005); benthic microbes (10.09, 0.005); gross release (7.34, 0.01); water regime (7.34, 0.01); enclosure experiments (7.34, 0.01) |
| 13 | 25 | 0.935 | 2000 | turbid (10.93, 0.001); clear-water state (7.91, 0.005); ponds (7.41, 0.01); eutrophic (7.41, 0.01); cyanobacteria (5.98, 0.05)                         |
| 14 | 24 | 0.964 | 1997 | root to shoot (19.38, 1.0E-4); environmental drivers (9.66, 0.005); gulf of mexico (9.66, 0.005); estuary (9.66, 0.005); relative yield (9.66, 0.005)  |
| 15 | 20 | 0.992 | 2002 | fatty acids (30.54, 1.0E-4); n-alkanes (20.27, 1.0E-4); tibetan plateau (20.27, 1.0E-4); algae (11.96, 0.001); fuxian lake (10.09, 0.005)              |

---
